# Supplementary material
Source: PubMed Central journal article supplement (PMC3471651)
Supplement: NIHMS357238-supplement-Supplemental_files.pdf [file NIHMS357238-supplement-Supplemental_files.pdf]

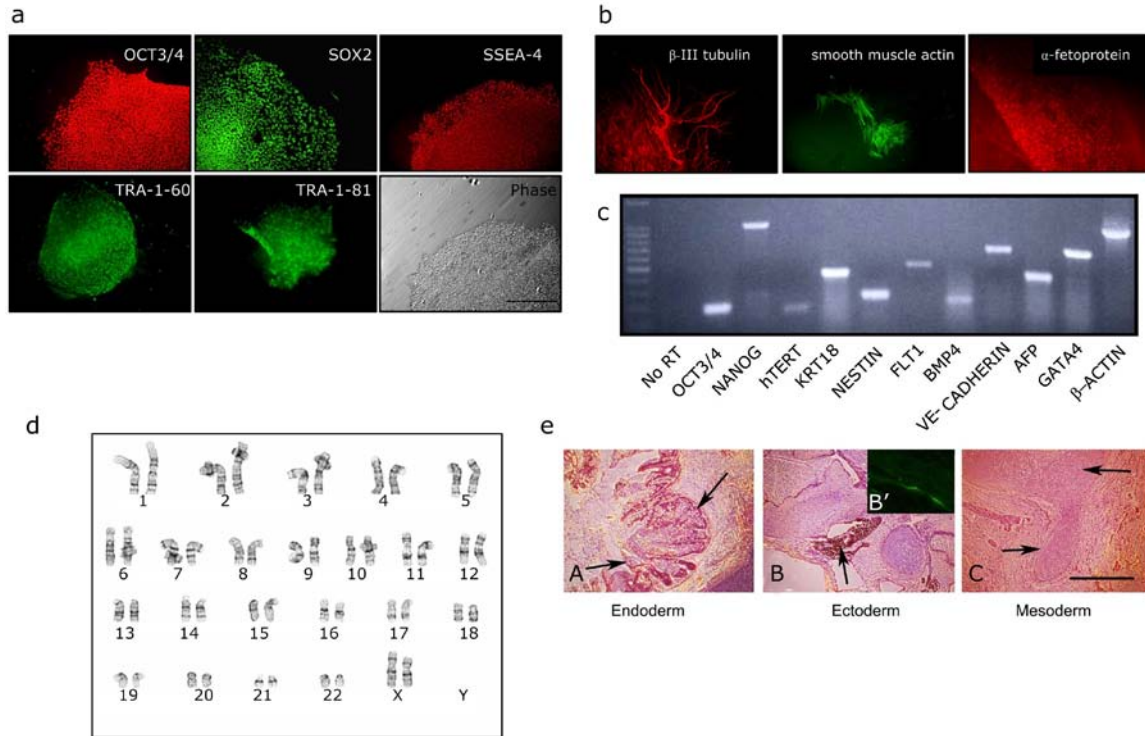

**Supplementary Figure 1. Long-term culture of H9 hES cells on PMEDSAH and Matrigel in MEF-CM.** (a) Fluorescence micrographs of colonies of H9 cells cultured on PMEDSAH in MEF-CM showing expression of hES cell markers: OCT3/4, SOX2, SSEA-4, TRA-1-60 and TRA-1-81; and a phase-contrast image. (b) Micrographs illustrating immunoreactivity for  $\beta$ -III tubulin (ectoderm), smooth muscle actin (mesoderm) and  $\alpha$ -fetoprotein (endoderm) demonstrating that H9 cells remained capable of tri-lineage differentiation. Scale bar indicates 200  $\mu$ m. (c) RT-PCR analysis of expression of hES cell markers (*OCT3/4*, *NANOG*, *hTERT*) from undifferentiated cell colonies and from RNAs isolated from embryoid bodies illustrating the expression of genes characteristic of: ectoderm (*KRT-18*, *NESTIN*), mesoderm (*BRACHURY*, *FLT-1*, *BMP-4*, *VE-CADHERIN*) and endoderm (*AFP*, *GATA-4*). Negative control (Lane 1: no template) and positive control ( $\beta$ -*ACTIN*). (d) Representative karyotype of H9 cells cultured on Matrigel. (e) Sections of teratomas induced by injecting hES cells, cultured on Matrigel, in immunosuppressed mice. H & E stained paraffin sections indicating the presence of endoderm (goblet-like cells: arrow A), pigmented ectoderm (arrows B; and immunohistochemical localization of  $\beta$ -III tubulin in neuronal cells: arrow B') and mesodermal derivatives (cartilage, connective tissue and muscle: arrow C). Scale bar indicates 200  $\mu$ m.

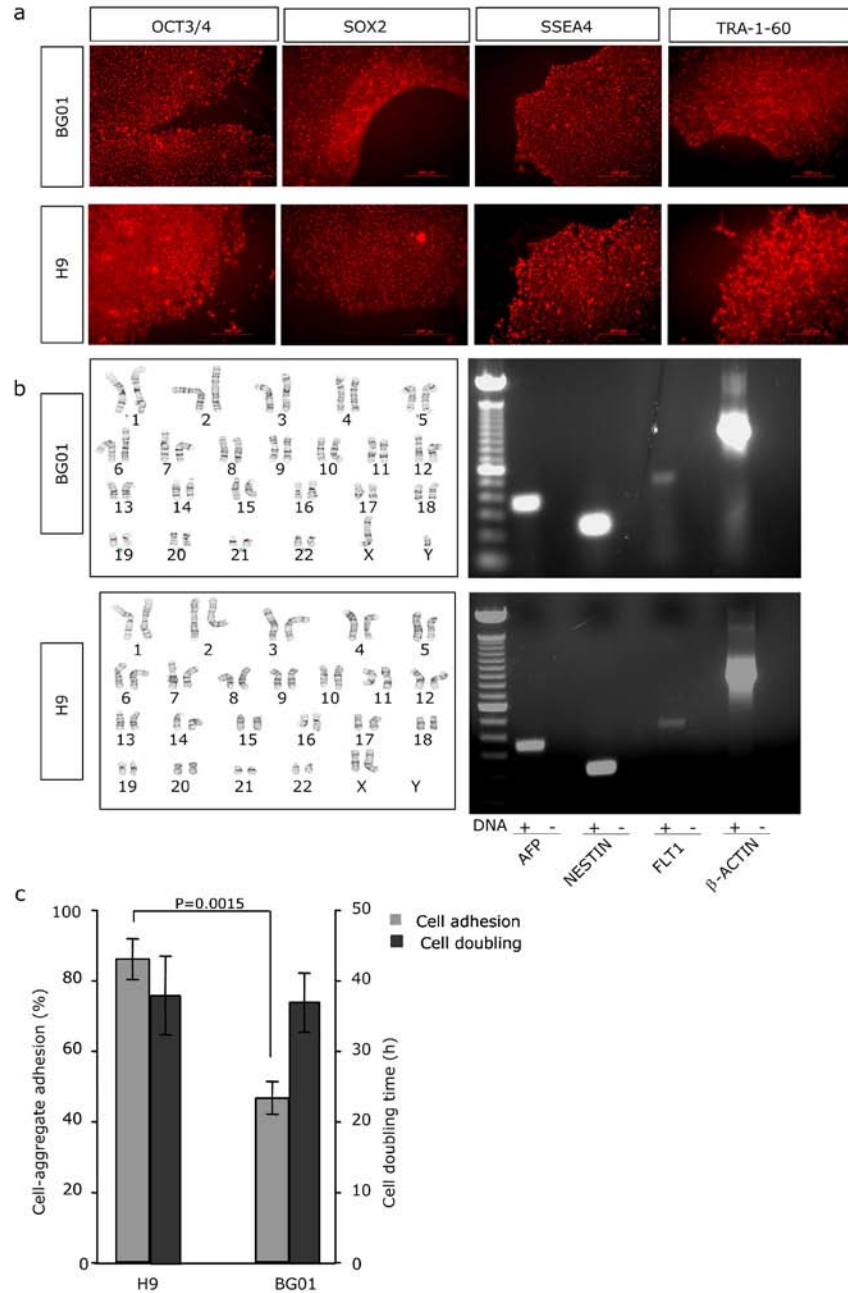

**Supplementary Figure 2. Characterization of BG01 and H9 hES cells on PMEDSAH in hCCM.** (a) Fluorescence micrographs of colonies illustrating expression of hES cell markers: OCT3/4, SOX2, SSEA-4 and TRA-1-60. (b) Representative chromosomal spreads and RT-PCR analysis of RNAs from embryoid bodies illustrating expression of genes characteristic of: endoderm (*AFP*), ectoderm (*NESTIN*) and mesoderm (*FLT-1*).  $\beta$ -*ACTIN* was used as positive control and for each primer set tested, a reaction lacking RNA was assessed in parallel as a negative control. (c) Comparison of percentage (mean  $\pm$  standard error) of cell-aggregate adhesion and cell population-doubling time of both cell lines cultured on PMEDSAH in hCCM.

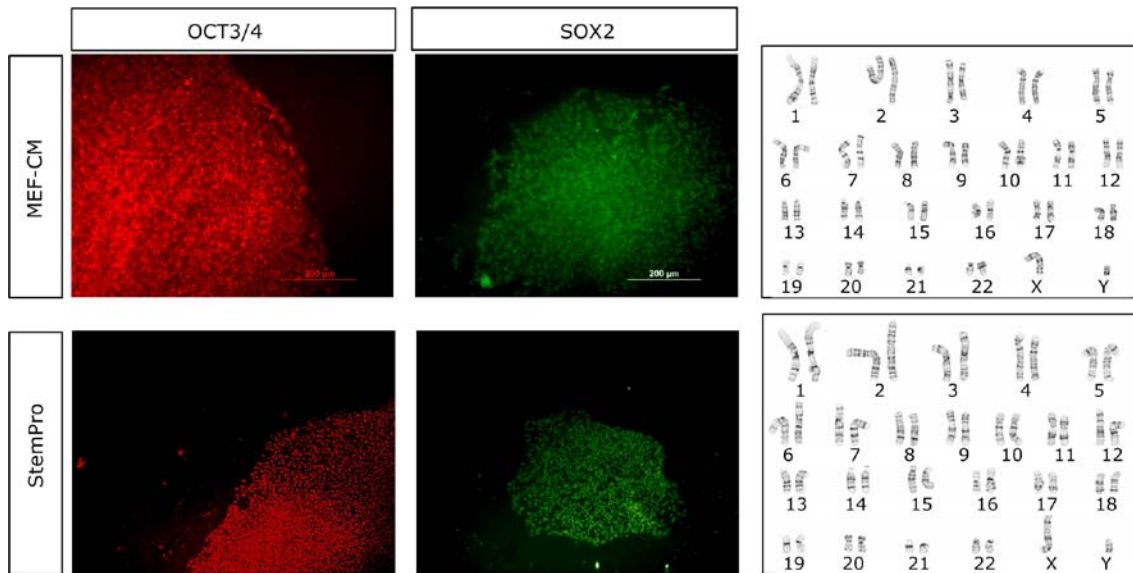

**Supplementary Figure 3.** Expression of hES cell markers (OCT3/4 and SOX2) and normal karyotype of BG01 hES cells cultured on PMEDSAH in MEF-CM and StemPro at passages 5 and 3, respectively. Tri-lineage differentiation capability of BG01 hES cells was confirmed via EB formation.

**Supplementary Table 1.** Microarray analysis showing fold change in gene expression of hES cells cultured on PMEDSAH compared to cells grown on Matrigel. Genes corresponding to ES cell markers and those found exclusively in hES cells are shown.

| <b>Symbol</b>  | <b>Name</b>                                                    | <b>UniGene</b> | <b>Fold Change</b> |
|----------------|----------------------------------------------------------------|----------------|--------------------|
| <i>ABHD9</i>   | Abhydrolase domain containing 9                                | Hs.156457      | 0.083              |
| <i>C2orf56</i> | Chromosome 2 open reading frame 56                             | Hs.433466      | -0.164             |
| <i>CLDN6</i>   | Claudin 6                                                      | Hs.533779      | 0.076              |
| <i>CXorf15</i> | Chromosome X open reading frame 15                             | Hs.555961      | -0.079             |
| <i>CYP26A1</i> | Cytochrome P450, family 26, subfamily A, polypeptide 1         | Hs.150595      | 0.088              |
| <i>DBNDD1</i>  | Dysbindin (dystrobrevin binding protein 1) domain containing 1 | Hs.301394      | -0.107             |
| <i>DCC1</i>    | Defective in sister chromatid cohesion homolog 1               | Hs.315167      | -0.039             |
| <i>DNMT3A</i>  | DNA (cytosine-5-)-methyltransferase 3 alpha                    | Hs.515840      | -0.172             |
| <i>DTYMK</i>   | Deoxythymidylate kinase (thymidylate kinase)                   | Hs.471873      | -0.159             |
| <i>EPHA1</i>   | EPH receptor A1                                                | Hs.89839       | 0.161              |
| <i>ETV4</i>    | Ets variant gene 4 (E1A enhancer binding protein, E1AF)        | Hs.434059      | 0.082              |
| <i>FGF2</i>    | Fibroblast growth factor 2 (basic)                             | Hs.284244      | 0.010              |
| <i>GDF3</i>    | Growth differentiation factor 3                                | Hs.86232       | -0.170             |
| <i>GPR23</i>   | G protein-coupled receptor 23                                  | Hs.522701      | 0.243              |
| <i>HESX1</i>   | HESX homeobox 1                                                | Hs.171980      | -0.849             |
| <i>L1TD1</i>   | LINE-1 type transposase domain containing 1                    | Hs.562195      | -0.099             |
| <i>LIN28</i>   | Lin-28 homolog (C. elegans)                                    | Hs.86154       | -0.019             |
| <i>MCM10</i>   | Minichromosome maintenance complex component 10                | Hs.198363      | 0.218              |
| <i>MYBL2</i>   | V-myb myeloblastosis viral oncogene homolog (avian)-like 2     | Hs.179718      | -0.353             |
| <i>NANOG</i>   | Nanog homeobox                                                 | NM_024865      | 0.036              |
| <i>NCAPH</i>   | Non-SMC condensin I complex, subunit H                         | Hs.308045      | -0.124             |
| <i>ORC1L</i>   | Origin recognition complex, subunit 1-like (yeast)             | Hs.17908       | -0.453             |
| <i>ORC2L</i>   | Origin recognition complex, subunit 2-like (yeast)             | Hs.444870      | -0.239             |
| <i>PODXL</i>   | Podocalyxin-like                                               | Hs.16426       | 0.315              |
| <i>POU5F1</i>  | POU class 5 homeobox 1                                         | Hs.249184      | -0.027             |
| <i>PRDM14</i>  | PR domain containing 14                                        | Hs.287532      | -0.715             |
| <i>PWP2</i>    | PWP2 periodic tryptophan protein homolog (yeast)               | Hs.449076      | 0.047              |
| <i>RRP9</i>    | RRP9, small subunit (SSU) processome component                 | Hs.153768      | -0.179             |
| <i>SLC5A6</i>  | Solute carrier family 5 6                                      | Hs.435735      | 0.108              |
| <i>SOX2</i>    | SRY (sex determining region Y)-box 2                           | Hs.518438      | 0.079              |
| <i>TDGF1</i>   | Teratocarcinoma-derived growth factor 1                        | Hs.385870      | 0.220              |
| <i>WSCD1</i>   | WSC domain containing 1                                        | Hs.370166      | -0.218             |
| <i>ZIC3</i>    | Zic family member 3 heterotaxy 1                               | Hs.111227      | -0.594             |

**Supplementary Table 2.** List of primers used in RT-PCR and qPCR

| <b>RT-PCR</b>      |                                 |                                 |                     |
|--------------------|---------------------------------|---------------------------------|---------------------|
| <b>Gene</b>        | <b>Forward primer</b>           | <b>Reverse primer</b>           | <b>Product (bp)</b> |
| <i>OCT3/4</i>      | ctgcagtgtgggttcgggca            | cttgctgcagaagtgggtggagga        | 168                 |
| <i>NANOG</i>       | cggcttcctcctctctctatac          | atcgattcactcatcttcacacgtc       | 953                 |
| <i>hTERT</i>       | cggaagagtgtctggagcaa            | ggatgaagcggagtctgga             | 144                 |
| <i>KRT18</i>       | tctgtggagaacgacatcca            | ctgtacgtctcagctctgtga           | 378                 |
| <i>NESTIN</i>      | cagctggcgcacctcaagatg           | agggaaagtgggctcaggactgg         | 209                 |
| <i>BMP4</i>        | tgagcctttccagcaagttt            | cttccccgtctcaggatca             | 182                 |
| <i>VE-CADHERIN</i> | acgggatgaccaagtacagc            | acacacttgggctggtagg             | 593                 |
| <i>FLT-1</i>       | atcagagatcaggaagcacc            | ggaactcatctgggtccat             | 451                 |
| <i>AFP</i>         | ccatgtacatgagcactgttg           | ctccaataactcctggatcc            | 357                 |
| <i>GATA-4</i>      | ctcctcaggcagtggagagc            | gagatgcagtgtgctcgtgc            | 574                 |
| <i>β-ACTIN</i>     | atctggcaccacacttctacaatgagctgcg | cgtcatactcctgcttctgatccacatctgc | 835                 |

| <b>qPCR</b>    |                        |                       |                     |
|----------------|------------------------|-----------------------|---------------------|
| <b>Gene</b>    | <b>Forward primer</b>  | <b>Reverse primer</b> | <b>Product (bp)</b> |
| <i>SOX-2</i>   | gagagaaagaaagggagagaag | gagagaggcaaactggaatc  | 140                 |
| <i>NANOG</i>   | tcctcctctctctatactaac  | cccacaaatcaggcatag    | 112                 |
| <i>OCT3/4</i>  | agtcagtgaacaggggaatgg  | tcgggattcaagaacctcg   | 131                 |
| <i>β-ACTIN</i> | gccgaggactttgattgc     | gtgtggacttgggagagg    | 143                 |

## SUPPLEMENTARY METHODS

### Polymer synthesis

All polymer coatings were prepared on tissue culture polystyrene (TCPS) dishes (35 mm; Becton Dickinson and Co, Franklin Lakes, NJ). All monomers were purchased from Sigma Aldrich (St. Louis, MO) except carboxybetaine methacrylate (CBMA) which was synthesized and characterized as previously described<sup>1</sup>. Graft-polymerization was carried out using a 0.2 M solution of methacrylate monomers in a 4:1 mixture of water and ethanol<sup>2</sup>. The TCPS dishes were activated using a UV-ozone cleaner (Jelight Co. Inc, Irvine, CA) for 40 min. Surface-activated dishes were immersed into the monomer solution at 80 °C for 2.5 h. Polymer-coated dishes were allowed to cool to 50°C and were rinsed with a warm saline solution (1% NaCl in water, at 50 °C). Polymer-coated dishes were then rinsed overnight in saline solution at 50 °C. Dishes were cleaned by ultrasonication in DI-water and dried under a stream of nitrogen gas. Polymer-coated dishes were stored at room temperature prior to cell culture. For Fourier transform infrared spectroscopy and ellipsometry, a gold-coated Si substrate coated with poly-*p*-xylylene was included in each graft-polymerization reaction<sup>3</sup>.

### Characterization of polymer coatings

Elemental analysis of the polymer coatings was conducted using X-ray photoelectron spectroscopy (Axis Ultra XPS, Kratos Analyticals, UK) equipped with a monochromatized Al K $\alpha$  X-ray source. Spectra were referenced to an unfunctionalized aliphatic carbon at 285.0 eV. Presence of polymer coatings was confirmed using Fourier transform infrared (FTIR) spectroscopy (Nicolet 6700 spectrometer) using the grazing angle accessory (SAGA) with an angle of 85°. Coating thickness was recorded at a wavelength of 532 nm using EP<sup>3</sup>-SW imaging ellipsometer (Nanofilm Technology GmbH, Germany). Four-zone nulling was performed at an angle of incidence of 65° and an anisotropic Cauchy parameterization model was used for curve fitting. Nanoindentation was performed by CSM instruments Inc. (Needham, MA) using a CSM NanoHardness tester equipped with a conospherical diamond tip (with a radius of 20  $\mu$ m) in the load-control mode. A typical nanoindentation experiment involved engaging the

tip under loading rate of 1.00 mN/min, indenting to a maximum load of 0.5 mN, and then withdrawing the tip with the same rate as for the loading. For each hydrogel coating, load-displacement data was acquired for 5 indentations. Reduced modulus ( $E_r$ ) was calculated using the unloading portions of these load-displacement curves according to a method developed by Gerberich et al<sup>4</sup>.

### **Preparation of polymer-coated dishes before cell culture**

Before cell seeding, all polymer-coated dishes were sterilized with UV-light overnight (12 h), washed twice with sterile phosphate buffer saline (PBS) and equilibrated with culture medium for at least 48 h at 37 °C in 5% CO<sub>2</sub> atmosphere.

### **Matrigel preparation**

Matrigel (BD BioSciences, San Jose, CA) was diluted 1:20 in cold Dulbecco's modified Eagle's medium/F12 (DMEM/F12; GIBCO, Carlsbad, CA), was applied to the dishes, and the coating was allowed to polymerize overnight at 4 °C or for 2 h at room temperature<sup>5</sup>.

### **Cell culture media preparation**

Culture medium for hES cells grown on irradiated MEFs was composed of standard DMEM/F12 supplemented with 20% KnockOut serum replacement (GIBCO), 0.1 mM  $\beta$ -mercaptoethanol, 1 mM L-glutamine, 1% non-essential amino acids and 4 ng/ml human recombinant basic fibroblast growth factor (Invitrogen; Carlsbad, CA). MEF-CM was prepared as described previously<sup>6</sup>. Irradiated MEFs ( $8 \times 10^6$  cells) were seeded onto gelatin-coated culture dishes in medium composed of high glucose DMEM, 10% fetal bovine serum (FBS; GIBCO), 1% non-essential amino acids, and 200 mM L-glutamine. After 24 h, MEF culture medium was replaced with the hES cell culture medium described above (60 ml). This medium was left in contact with MEFs and was collected as MEF-CM after 24 h of conditioning. Media was changed daily and MEF-CM was collected for 3 days. The MEF-CM was frozen at -2 °C and was supplemented with 0.1 mM  $\beta$ -mercaptoethanol, 2 mM L-glutamine, and 4 ng/ml bFGF prior to use. Human-cell-conditioned-medium (hCCM, GlobalStem, Inc., Rockville, MD), mTeSR<sup>TM</sup>1

(STEMCELL Technologies, Vancouver, BC) and StemPro@hESC SFM (Invitrogen, Carlsbad, CA) were prepared according to manufacturers' protocols, with the exception that defined medium was prepared with DMEM/F12 plus L-glutamine and 15 mM HEPES (GIBCO). Media were pre-equilibrated at 37 °C in 5% CO<sub>2</sub> atmosphere before use.

### **Cell culture**

Two federally-approved hES cell lines: BG01 (NIH code: BG01; BresaGen, Inc., Athens, GA), and H9 (NIH code: WA09; WiCell, Madison, WI) were used and cultured at 37 °C with 5% CO<sub>2</sub>. Human ES cell colonies were observed every 48 h using a Leica stereomicroscope and differentiated cells were removed mechanically using a sterile pulled-glass pipette. Cell culture medium was replaced every 48 h.

### **Cell culture media transition and passaging**

Before mechanical harvesting of hES cells growing on MEFs, cell culture medium was replaced by either MEF-CM or hCCM. Similarly, a transition from hCCM to defined media (mTeSR or StemPro) was performed. Cultures were passaged depending on size and density of colonies every 7-10 days. Undifferentiated hES cell colonies were mechanically passaged by cutting small aggregates of cells using a sterile pulled-glass pipette, when colonies were large, beginning to merge, and had centers that were dense and brighter compared to their edges. 50-100 hES cell-aggregates were transferred to each polymer- or Matrigel-coated dishes.

### **Cell-aggregate adhesion assay**

The cell-aggregate adhesion assay was performed at each passage and an average value was reported. Number of adherent colonies and number of floating embryoid bodies (EBs) were counted 48 h after cell seeding. Percentage of cell-aggregate adhesion was calculated as follows:

Cell-aggregate adhesion (%) = (number of adhered colonies)×(100)/(number of adhered colonies + number of EBs floating). Statistics were performed using an unpaired t-test.



### **Cell population-doubling time**

Cell population-doubling time was calculated as time required for the area of a colony to increase two-fold<sup>7</sup>. Colony area was calculated by using the surface area equation of an ellipse ( $\pi \times a \times b / 4$ , where a and b are the horizontal and longitudinal diameters). ImageJ software (<http://rsb.nih.gov/ij>) was used to measure colony diameters. Colony area (n=15) was calculated at five time-points (for 5 days after cell seeding), and cell population-doubling time was estimated as an exponential function. Unpaired t-test was used to calculate p values.

### **Immunocytochemistry**

Cells were fixed in 2% paraformaldehyde for 30 min at room temperature and then permeabilized with 0.1% Triton X-100 for 10 min. Primary antibodies were diluted in 1% normal serum and incubated overnight at 4 °C and detected by respective secondary antibodies. Samples were imaged and captured using a Leica DM IRB inverted microscope with an Olympus DP-30 CCD camera (Microscopy and Image Analysis Laboratory, University of Michigan, Ann Arbor). Throughout this study, hES cells were characterized every fifth passage for their expression of the hES cell markers: OCT3/4, SOX2, SSEA4, TRA-1-60 and TRA-1-81. ImageJ software was used to count the number of OCT3/4 or SOX2 positive cells and number of cell nuclei (Hoechst) present in each colony. The percentage of cells expressing each marker was calculated for colonies cultured on PMEDSAH- and Matrigel- coated plates. Data were averaged and compared using unpaired t-test to calculate p values.

### **Cytogenetic analysis**

Karyotype analysis was performed at Cell Line Genetics (Madison, WI) by GTL-banding on at least 20 cells per analysis per substrate.

### **Evaluation of pluripotency**

Undifferentiated H9 hES cells ( $5 \times 10^6$  cells) growing on PMEDSAH or Matrigel in MEF-CM at passage 25 were injected subcutaneously into CB17 SCID mice (Charles River Laboratories, Wilmington, MA) to induce teratomas. When tumors became

palpable after 3-6 weeks, mice were euthanized; tumors were harvested, and processed for histological analysis at the Center for Organogenesis Morphology Core (University of Michigan).

Pluripotency was also evaluated by EB formation from undifferentiated hES cells. Colonies were cultured in suspension in hES cell culture medium lacking bFGF for 10 days to promote differentiation. Alternatively, hES cells were allowed to overgrow in MEF-CM without bFGF for 10 days.

### **Extraction and purification of total RNA**

Cells were manually scraped from dishes and pelleted by centrifugation at 800 g. Pellets were then disrupted by vigorous pipetting in 1000  $\mu$ l of Trizol Reagent (Invitrogen, Carlsbad, CA). Chloroform (200  $\mu$ l) was added to this solution followed by centrifugation ( $\sim$  13,000 g). Aqueous phase containing RNA was separated and additionally purified using the RNeasy Mini-Kit (Qiagen, Valencia, CA) following the manufacturer's RNA Clean-up protocol with the optional On-column DNase treatment. RNA quality was checked using RNA 6,000 Nano assays performed on the Bioanalyzer 2100 Lab-on-a-Chip system (Agilent Technologies, Palo Alto, CA).

### **Reverse-transcription PCR (RT-PCR) analysis**

Total RNA was reverse transcribed using SuperScript™ One-Step RT-PCR with platinum® Taq (Invitrogen). In a single reaction (50  $\mu$ l), 1  $\mu$ g of total RNA and 20 pmol of forward (f) and reverse (r) primers were used (**Supplementary Table 2** online). The cDNA synthesis and pre-denaturation were carried out in the first cycle at 48 °C for 45 min, followed by a second cycle at 94 °C for 2 min. The PCR amplification was performed for 35 cycles at 94 °C for 15 sec, 5 °C for 30 sec, and 72 °C for 1 min. The final extension cycle was run at 72 °C for 8 min. Finally, 10  $\mu$ l of PCR reaction products were loaded onto a 1.0% agarose gel and size-fractionated.

### **Microarray analysis**

Total RNA (10  $\mu$ g) from hES cells grown on each substrate was hybridized to Affymetrix Human Genome U133 Plus 2.0 microarray (Affymetrix; Santa Clara, CA) following the

manufacturer's instructions. Data analysis was performed using a Robust Multi-array average algorithm that converted the plot of perfect match probe intensities into an expression value for each gene<sup>8</sup>. Based on a variance of 0.05, probe-sets that did not appear to be differentially expressed in any sample were filtered and removed. Differentially expressed genes were detected by fitting a linear model to each probe-set and selecting those with a multiplicity-adjusted p-value (FDR) of 0.05 or less<sup>9,10</sup>.

### **Quantitative Real-time PCR (qPCR) analysis**

Total RNA was reverse transcribed using the MultiScribe™ Reverse Transcriptase System (Applied Biosystems; Foster city, CA). The ABI 7300 PCR and Detection System (Applied Biosystems) with SYBR® Green PCR Master Mix (Applied Biosystems) were used to conduct real-time PCR in triplicate for each sample. Primers used are listed in **Supplementary Table 2** online. Human *β-ACTIN* was amplified as an internal standard. Relative quantification of *NANOG*, *OCT3/4* and *SOX2* gene expression was performed using the Comparative C<sub>T</sub> Method<sup>11</sup>.

### **References**

1. Zhang, Z., Chen, S.F. & Jiang, S.Y. Dual-functional biomimetic materials: Nonfouling poly(carboxybetaine) with active functional groups for protein immobilization. *Biomacromolecules* **7**, 3311-3315 (2006).
2. Wu, J.M. et al. A surface-modified sperm sorting device with long-term stability. *Biomedical Microdevices* **8**, 99-107 (2006).
3. Lahann, J. & Langer, R. Novel poly(p-xylylenes): Thin films with tailored chemical and optical properties. *Macromolecules* **35**, 4380-4386 (2002).
4. Gerberich, W.W. et al. Elastic loading and elastoplastic unloading from nanometer level indentations for modulus determinations. *J. Mater. Res.* **13**, 421-439 (1998).

5. Xu, C. et al. Feeder-free growth of undifferentiated human embryonic stem cells. *Nat Biotechnol* **19**, 971-974 (2001).
6. Villa-Diaz, L.G. et al. Analysis of the Factors That Limit the Ability of Feeder-Cells to Maintain the Undifferentiated State of Human Embryonic Stem Cells. *Stem Cells Dev* (2008).
7. Reubinoff, B.E., Pera, M.F., Vajta, G. & Trounson, A.O. Effective cryopreservation of human embryonic stem cells by the open pulled straw vitrification method. *Hum Reprod* **16**, 2187-2194 (2001).
8. Irizarry, R.A. et al. Exploration, normalization, and summaries of high density oligonucleotide array probe level data. *Biostatistics* **4**, 249-264 (2003).
9. Smyth, G.K., Michaud, J. & Scott, H.S. Use of within-array replicate spots for assessing differential expression in microarray experiments. *Bioinformatics* **21**, 2067-2075 (2005).
10. Benjamini, Y., Hochberg, Y. Controlling the false discovery rate: a practical and powerful approach to multiple testing. *Journal of the Royal Statistical Society* **57**, 289-300 (1995).
11. Schmittgen, T.D. & Livak, K.J. Analyzing real-time PCR data by the comparative C-T method. *Nat. Protoc.* **3**, 1101-1108 (2008).
